# Supplementary material for: Oxidative phosphorylation is a metabolic vulnerability of endocrine therapy and palbociclib resistant metastatic breast cancers
Source: PubMed Central journal article supplement (PMC10349040; doi:10.1038/s41467-023-40022-5), 2023-07-14
Supplement: 41467_2023_40022_MOESM4_ESM.pdf [file 41467_2023_40022_MOESM4_ESM.pdf]

## **Description of Additional Supplementary Files**

### Supplementary Data 1

Description: Heat map of statistically significant biochemicals between PDX and patients' primary tumours (PT).

### Supplementary Data 2

Description: Heat map of statistically significant biochemicals between HBCx-124 and HBCx-137 control and treated groups.

### Supplementary Data 3

Description: Chemical annotation, sample meta data and normalized metabolomics data.
